# Supplementary material for: Pyroptosis activates conventional type I dendritic cells to mediate the priming of highly functional anticancer T cells
Source: PubMed Central journal article supplement — J Immunother Cancer. 2024 Apr 4;12(4):e006781. doi: 10.1136/jitc-2023-006781 (PMC11002387; doi:10.1136/jitc-2023-006781), 2024-04-04
Supplement: jitc-2023-006781supp001.pdf [file jitc-2023-006781supp001.pdf]

## S. Figure 1

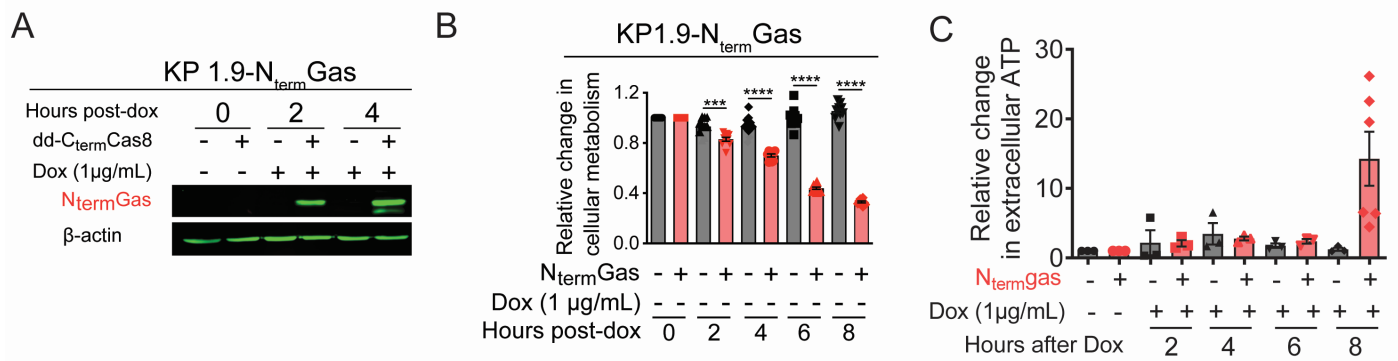

**Supplementary figure 1.** Inducible expression of N-terminal gasdermin E (N<sub>term</sub>Gas) in KP-1.9 lung adenocarcinoma cells activates pyroptosis (A) causing cell death (B), and the emission of extracellular ATP (C). Error bars, SD. One-way ANOVA followed by Tukey's HSD test used for statistical significance (\*\*\*) =  $p < 0.001$ , (\*\*\*\*) =  $p < 0.0001$ ). N = 6 per group.
