# Supplementary material for: Pyroptosis activates conventional type I dendritic cells to mediate the priming of highly functional anticancer T cells
Source: PubMed Central journal article supplement — J Immunother Cancer. 2024 Apr 4;12(4):e006781. doi: 10.1136/jitc-2023-006781 (PMC11002387; doi:10.1136/jitc-2023-006781), 2024-04-04
Supplement: jitc-2023-006781supp002.pdf [file jitc-2023-006781supp002.pdf]

## S. Figure 2

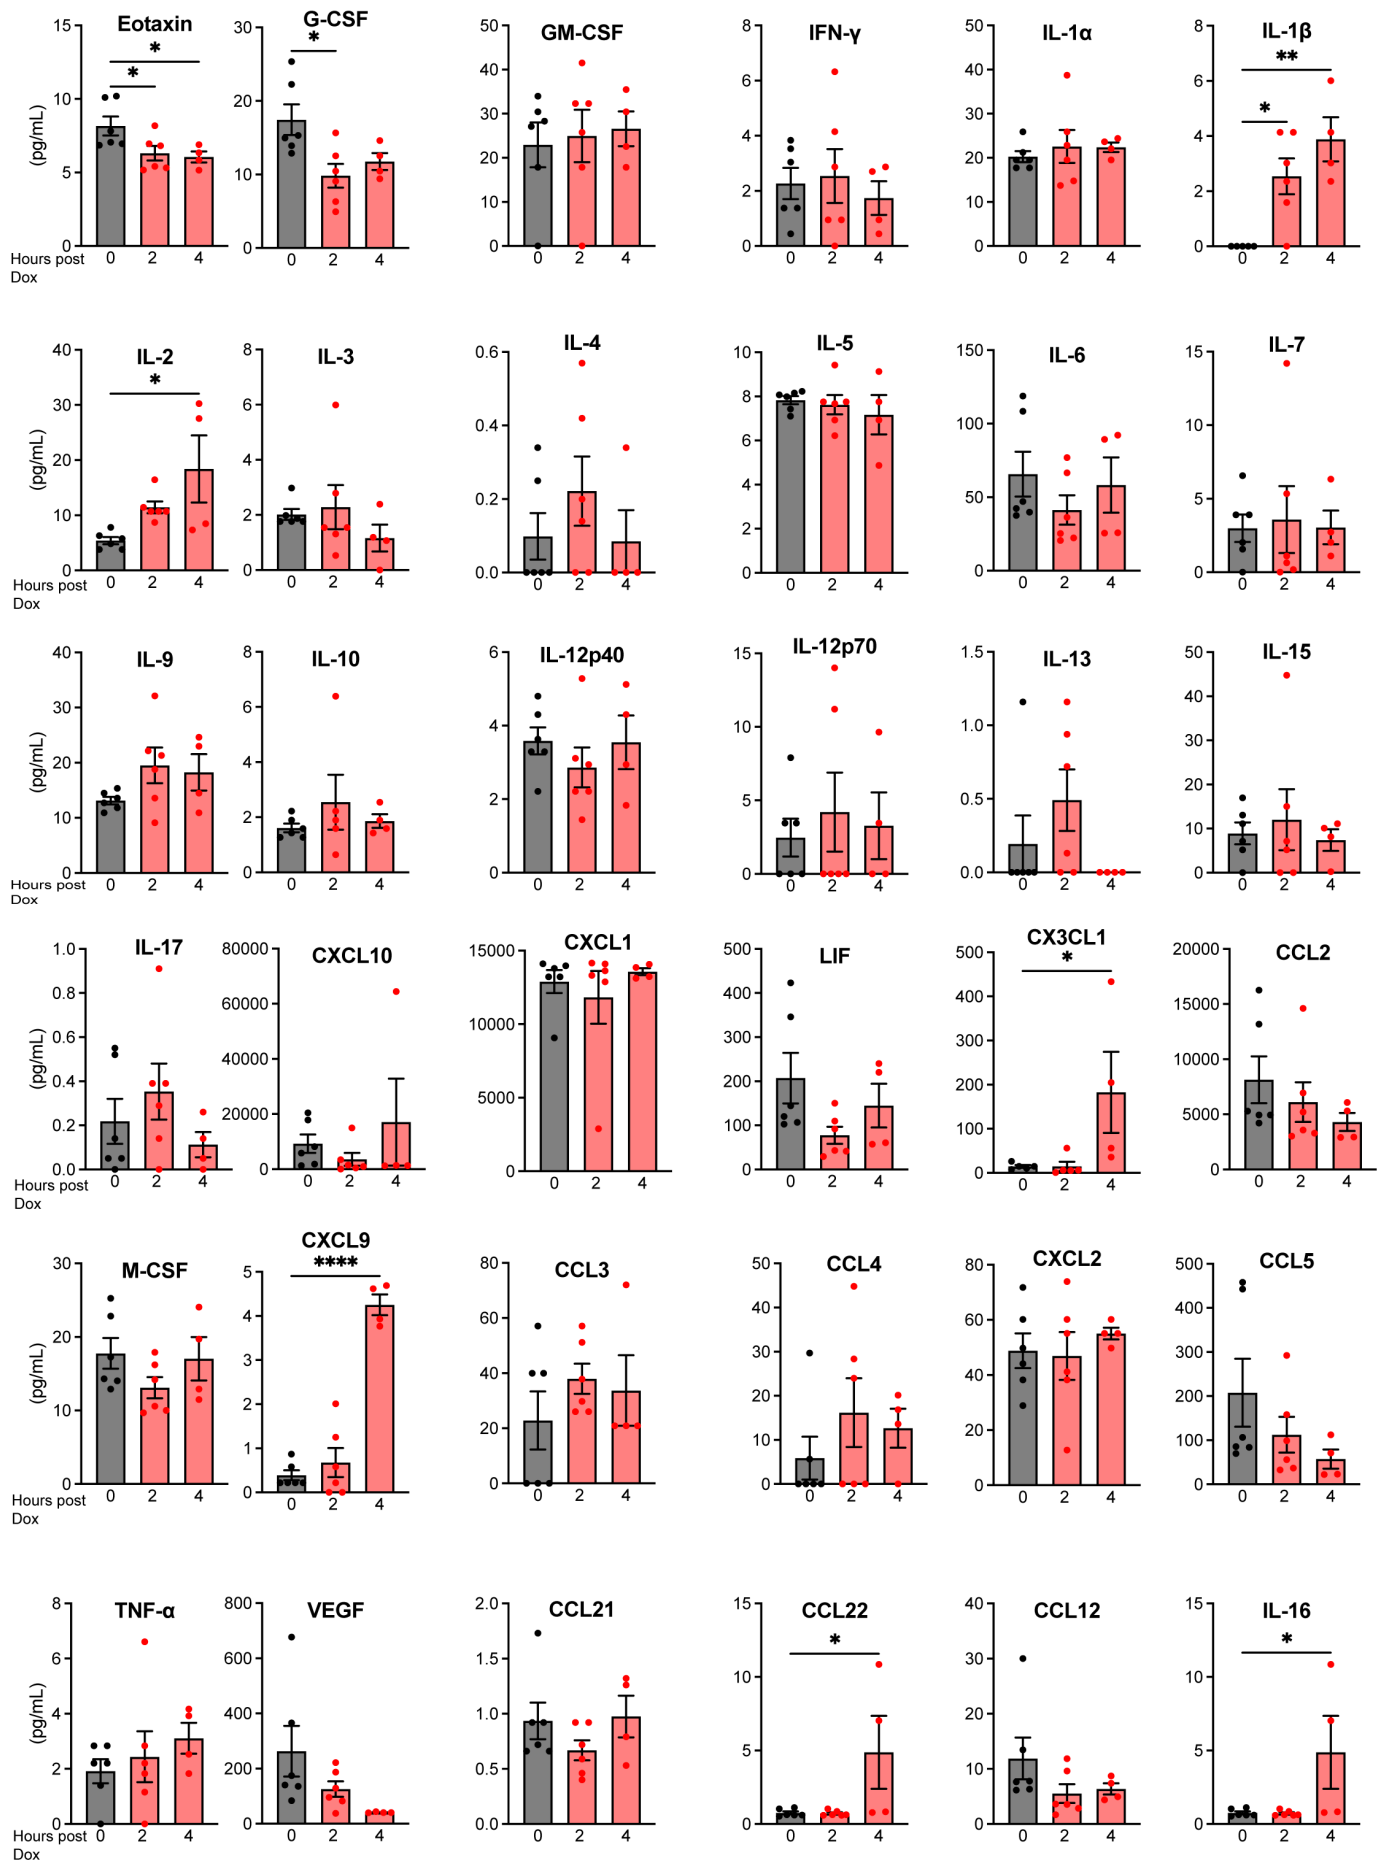

**Supplementary figure 2.** Cytokines and Chemokines released after activation of pyroptosis *in vitro*. Cell-free supernatants were collected from MC-38-N<sub>term</sub>Gas cells after 0, 2, and 4-hours of dox addition and analyzed using a 44-plex cytokine/chemokine assay. One-way ANOVA followed by Tukey's HSD test used for statistical significance (\* =  $p < 0.016$ , \*\* =  $p < 0.01$ , \*\*\* =  $p < 0.001$ , \*\*\*\* =  $p < 0.0001$ ). Error bars, SD. N= 4 per group.
