# Supplementary material for: Pyroptosis activates conventional type I dendritic cells to mediate the priming of highly functional anticancer T cells
Source: PubMed Central journal article supplement — J Immunother Cancer. 2024 Apr 4;12(4):e006781. doi: 10.1136/jitc-2023-006781 (PMC11002387; doi:10.1136/jitc-2023-006781), 2024-04-04
Supplement: jitc-2023-006781supp003.pdf [file jitc-2023-006781supp003.pdf]

## S. Figure 3

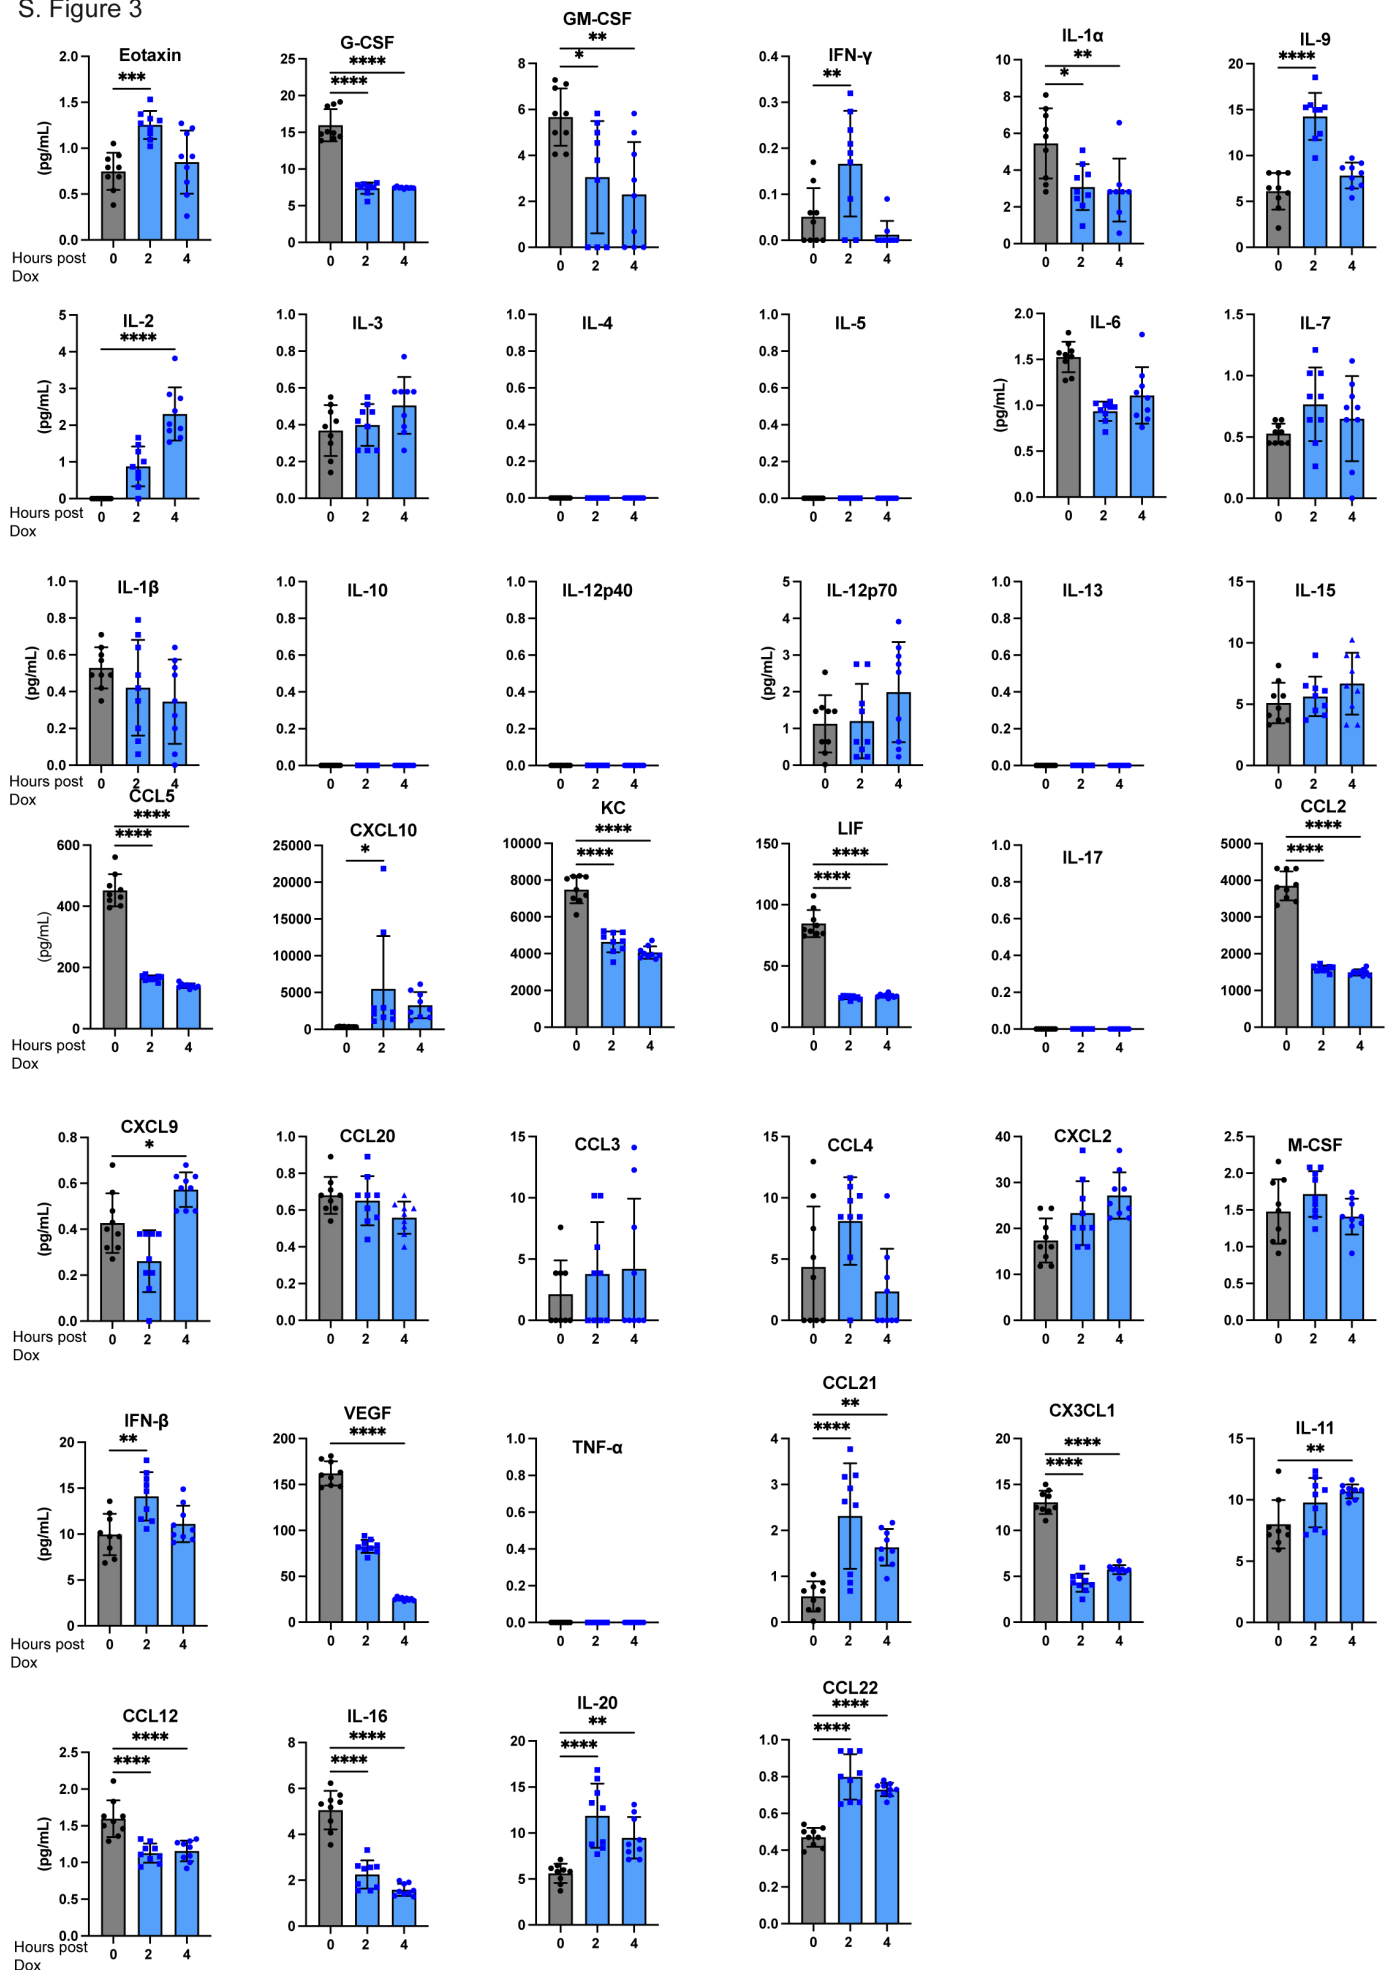

**Supplementary figure 3.** Cytokines and chemokines emitted after activation of apoptosis in MC-38 cells. Cell-free supernatant was collected from MC-38-C<sub>term</sub>Cas8 cells after 0,2, and 4-hours of dox addition and analyzed using a 44-plex cytokine chemokine assay. One-way ANOVA followed by Tukey's Honestly Significant Difference test used for statistical significance (\* =  $p < 0.016$ , \*\* =  $p < 0.01$ , \*\*\* =  $p < 0.001$ , \*\*\*\* =  $p < 0.0001$ ). Error bars, SD. N = 8 per group.
