# Supplementary material for: Pyroptosis activates conventional type I dendritic cells to mediate the priming of highly functional anticancer T cells
Source: PubMed Central journal article supplement — J Immunother Cancer. 2024 Apr 4;12(4):e006781. doi: 10.1136/jitc-2023-006781 (PMC11002387; doi:10.1136/jitc-2023-006781), 2024-04-04
Supplement: jitc-2023-006781supp005.pdf [file jitc-2023-006781supp005.pdf]

## S. Figure 5

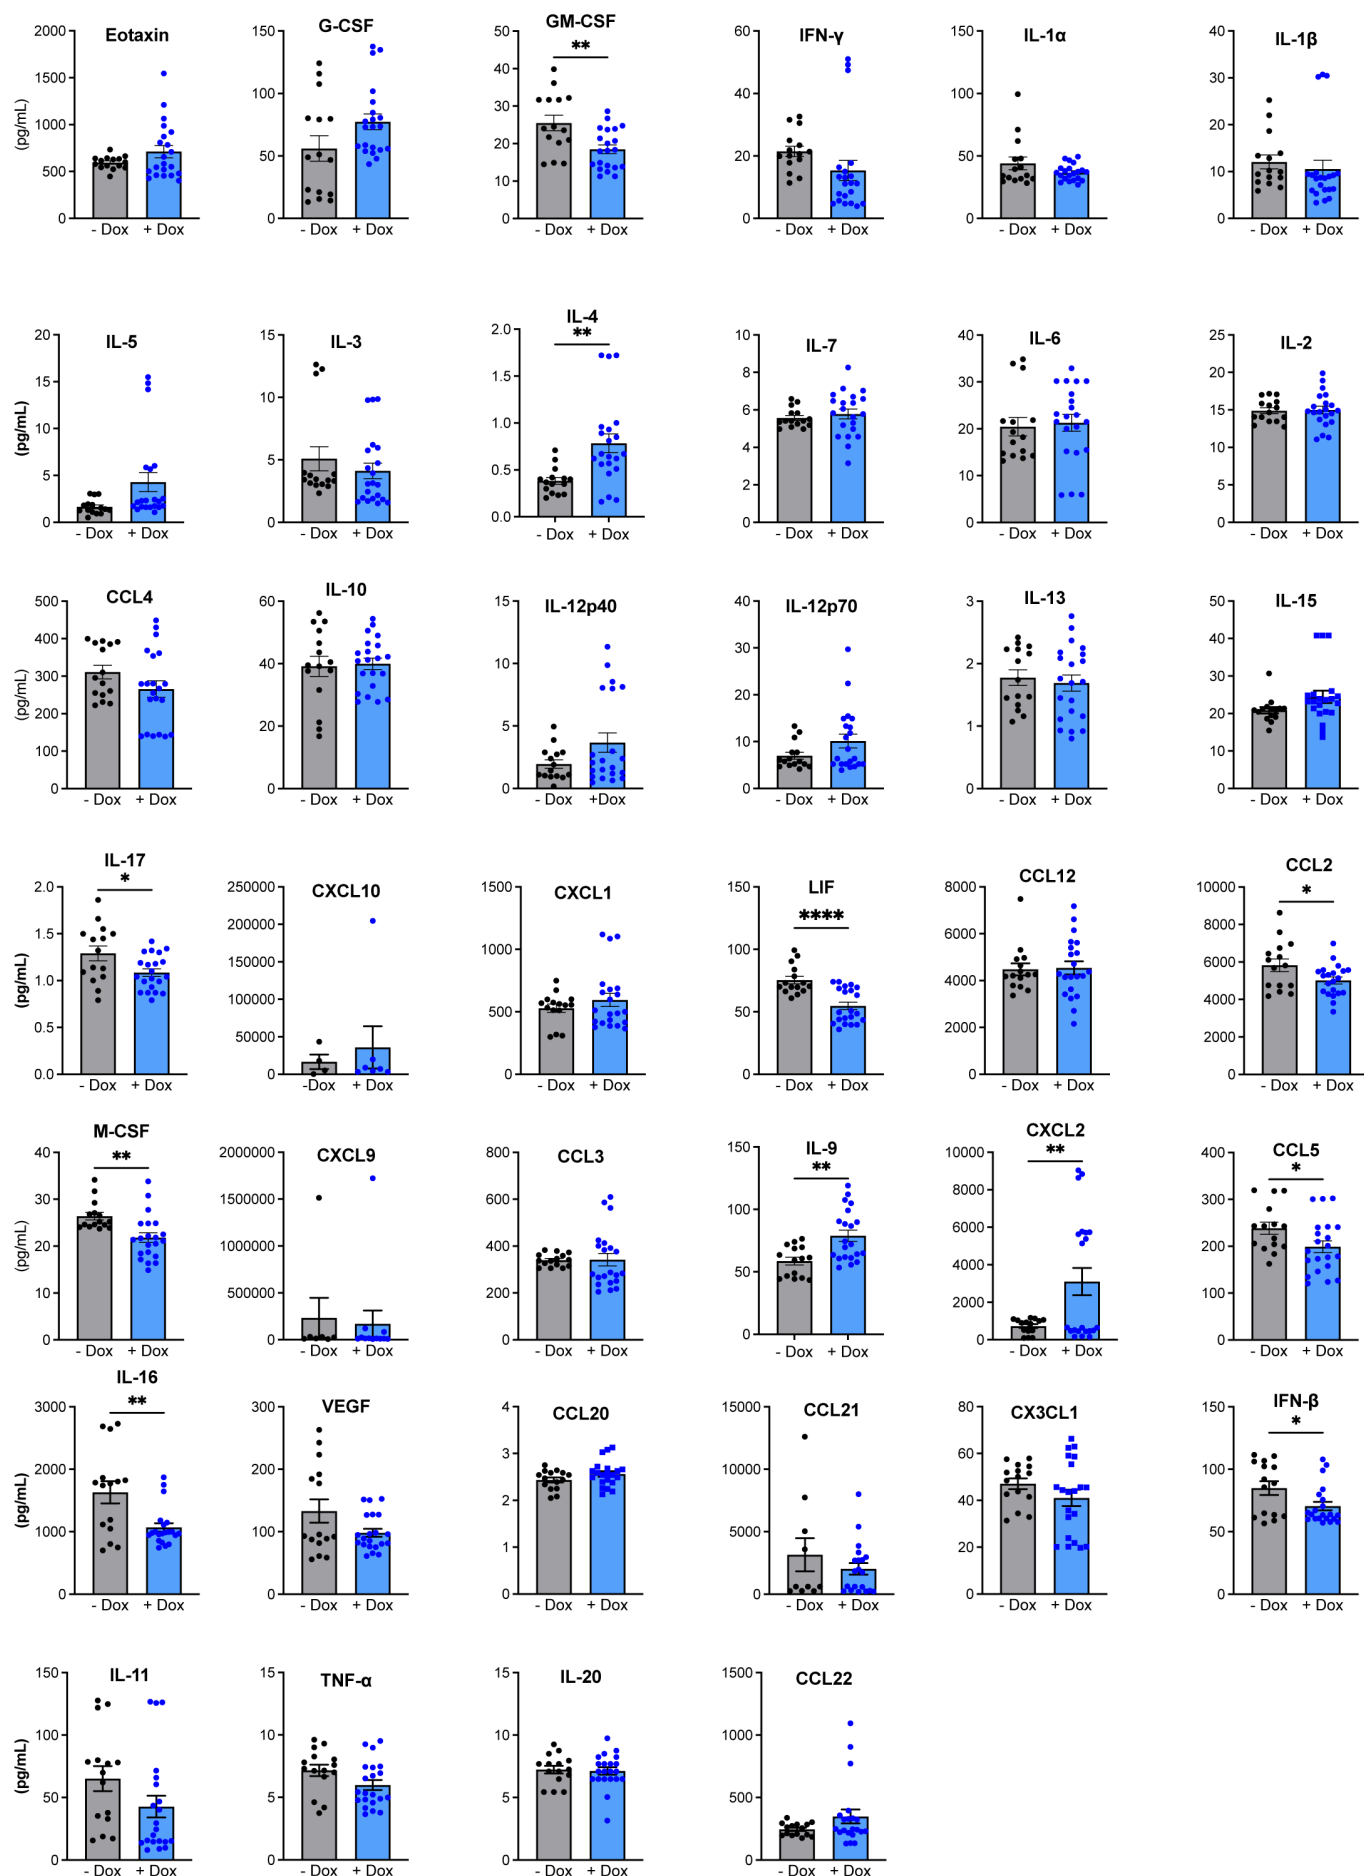

**Supplementary figure 5.** Changes in cytokines and chemokines after apoptosis in MC-38 tumour homogenates. Tumour homogenates were collected 24 hours after the addition of doxycycline medicated feed and analyzed using a 44-plex cytokine chemokine assay. Student's t test used for statistical significance (\* =  $p < 0.05$ , \*\* =  $p < 0.01$ , \*\*\* =  $p < 0.001$ , \*\*\*\* =  $p < 0.0001$ ). Error bars represent standard deviation. N = 15 per group.
