# Supplementary material for: Pyroptosis activates conventional type I dendritic cells to mediate the priming of highly functional anticancer T cells
Source: PubMed Central journal article supplement — J Immunother Cancer. 2024 Apr 4;12(4):e006781. doi: 10.1136/jitc-2023-006781 (PMC11002387; doi:10.1136/jitc-2023-006781), 2024-04-04
Supplement: jitc-2023-006781supp006.pdf [file jitc-2023-006781supp006.pdf]

## S. Figure 6

## MC38:MC38-NGas Chimera

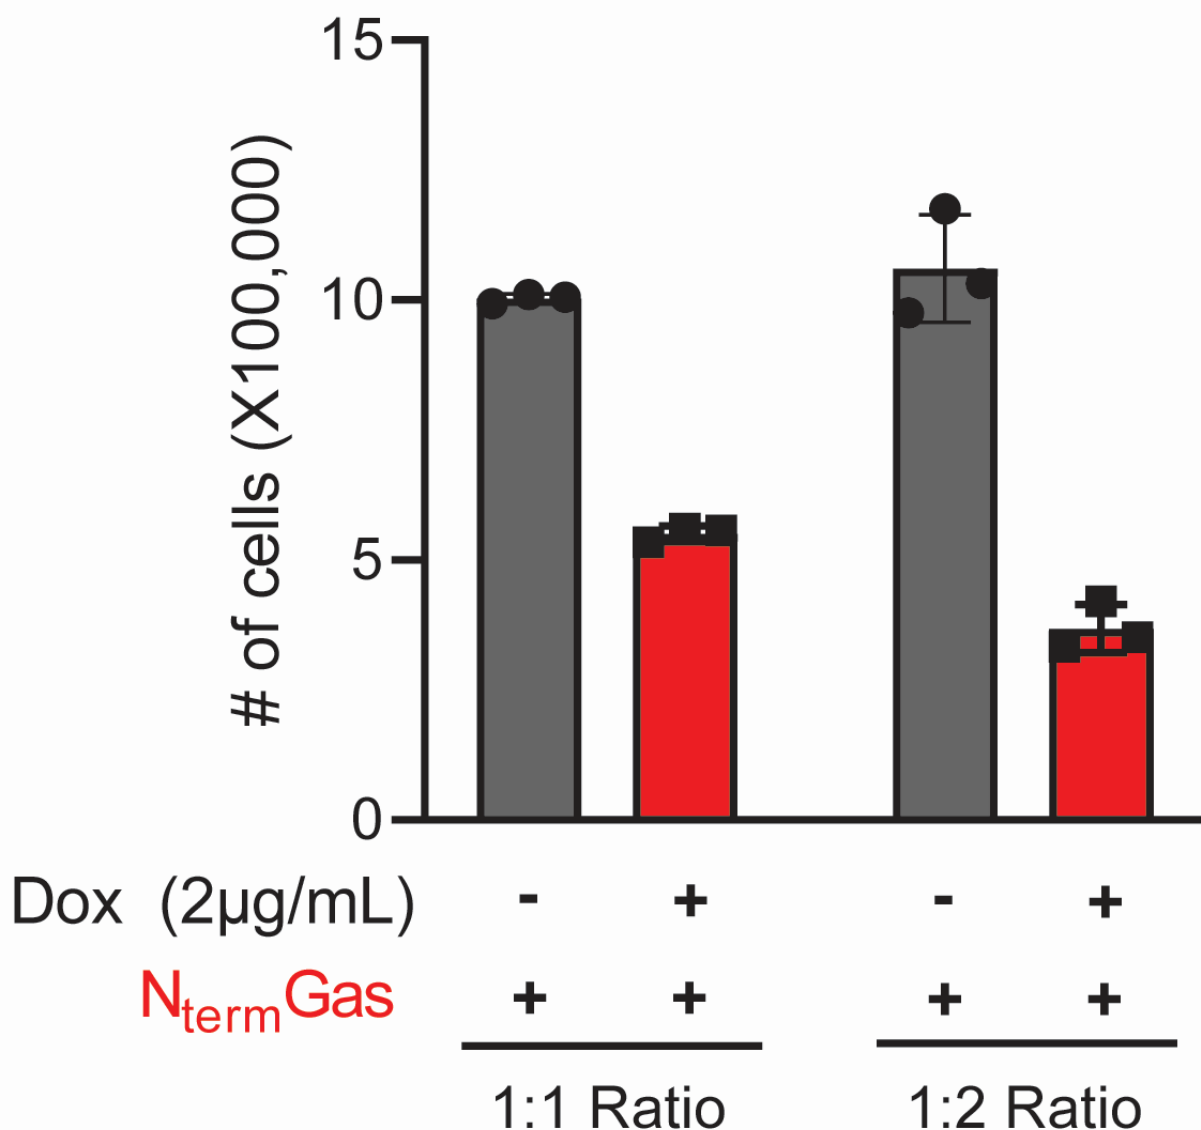

**Supplementary figure 6.** Co-culture of MC-38 and MC-38 N<sub>term</sub>Gas show similar growth rates *in vitro*. Viability was determined by counting of live cells after staining with trypan blue following a 6-hour treatment with or without 1 µg/mL doxycycline. N = 3 per group.
