# Supplementary material for: Pyroptosis activates conventional type I dendritic cells to mediate the priming of highly functional anticancer T cells
Source: PubMed Central journal article supplement — J Immunother Cancer. 2024 Apr 4;12(4):e006781. doi: 10.1136/jitc-2023-006781 (PMC11002387; doi:10.1136/jitc-2023-006781), 2024-04-04
Supplement: jitc-2023-006781supp007.pdf [file jitc-2023-006781supp007.pdf]

## S.Figure 7

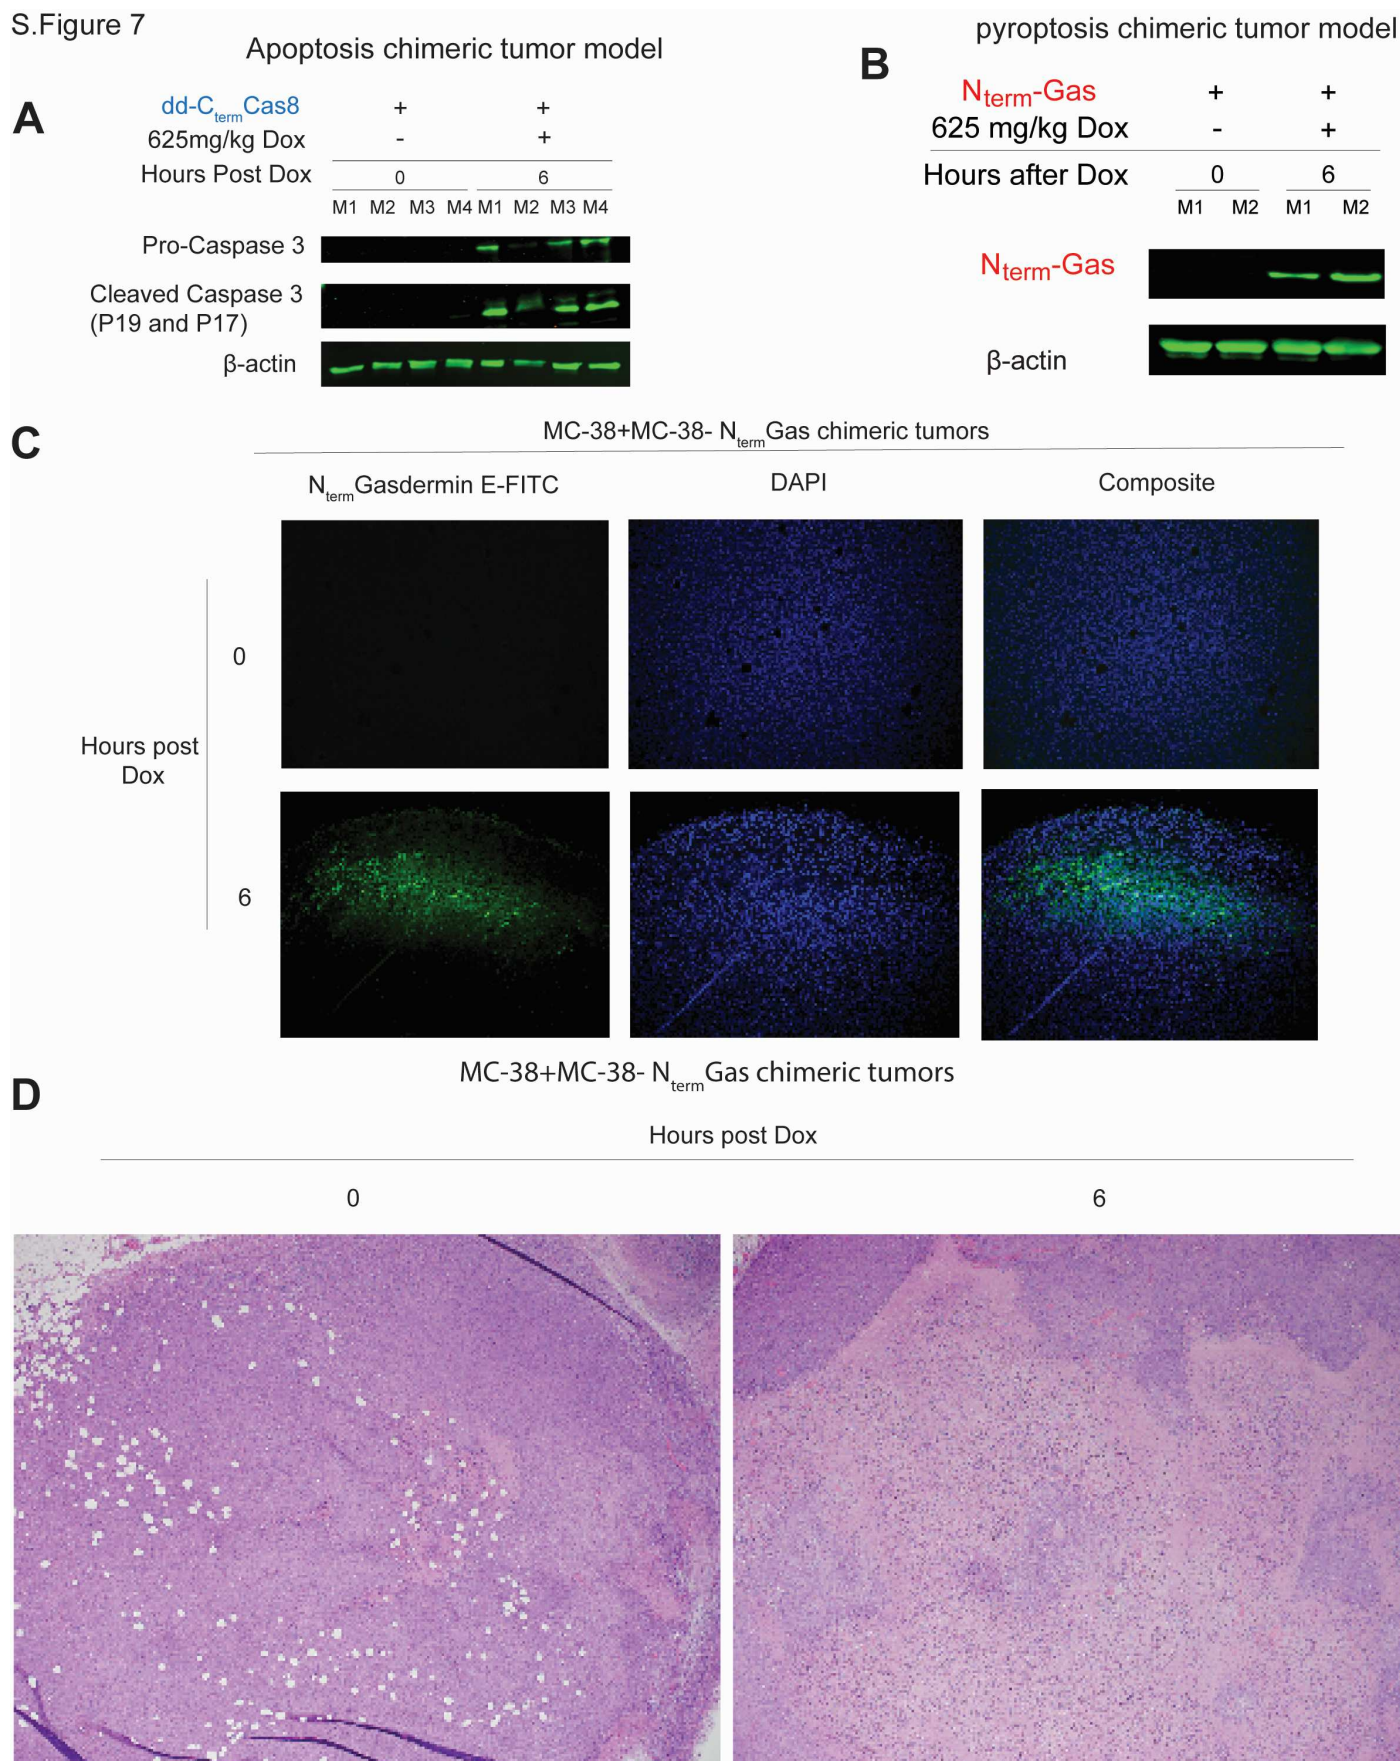

**Supplementary figure 7.** Chimeric tumors formed by transplanting wildtype and dd-C<sub>term</sub>Cas8 (A) or N<sub>term</sub>Gas (B) show inducible expression of the respective proteins after doxycycline mediated diet feeding. Immunohistochemical analysis of tumour slices shows localized pockets of N<sub>term</sub>Gas expression (C). Hematoxylin and eosin staining of chimeric tumours shows distinct large necrotic regions after induction of pyroptosis by N<sub>term</sub>Gas (D).
