# Supplementary material for: Pyroptosis activates conventional type I dendritic cells to mediate the priming of highly functional anticancer T cells
Source: PubMed Central journal article supplement — J Immunother Cancer. 2024 Apr 4;12(4):e006781. doi: 10.1136/jitc-2023-006781 (PMC11002387; doi:10.1136/jitc-2023-006781), 2024-04-04
Supplement: jitc-2023-006781supp009.pdf [file jitc-2023-006781supp009.pdf]

S.Figure 9

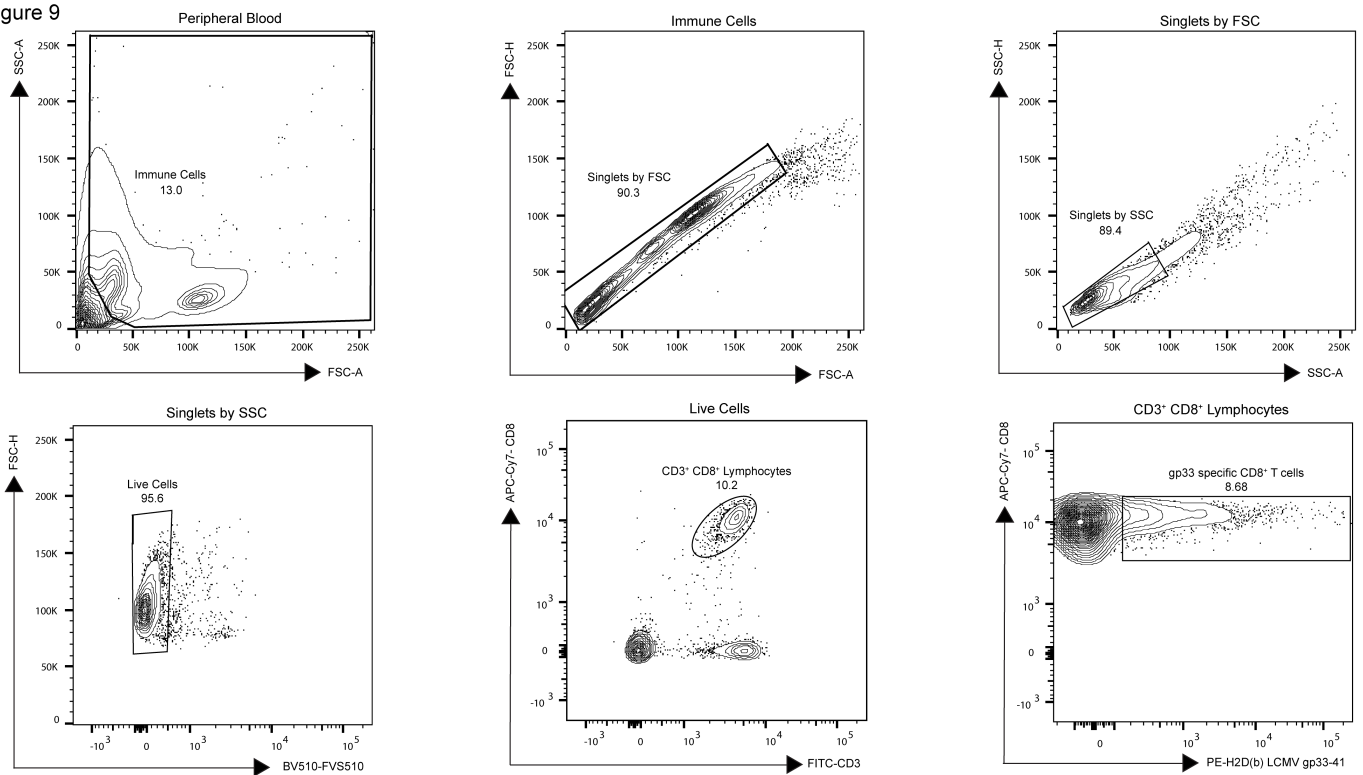

**Supplementary figure 9.** Gating strategy for CD8<sup>+</sup> T cells isolated from blood or tumors. CD8<sup>+</sup> T cells were defined as CD3<sup>+</sup> CD8<sup>+</sup>. Tumour/antigen specific T cells were defined by recognition of H2D(b) LCMV gp33-41 tetramer.
