# Supplementary material for: Pyroptosis activates conventional type I dendritic cells to mediate the priming of highly functional anticancer T cells
Source: PubMed Central journal article supplement — J Immunother Cancer. 2024 Apr 4;12(4):e006781. doi: 10.1136/jitc-2023-006781 (PMC11002387; doi:10.1136/jitc-2023-006781), 2024-04-04
Supplement: jitc-2023-006781supp010.pdf [file jitc-2023-006781supp010.pdf]

S.Figure 10

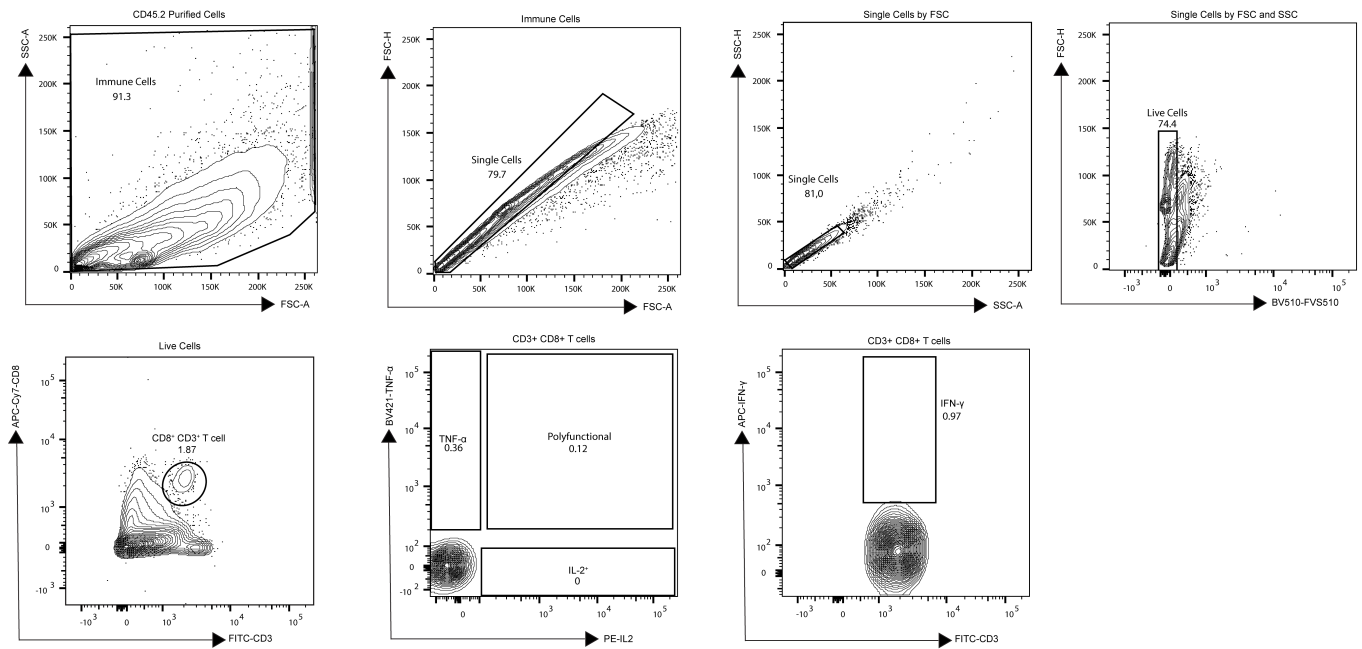

**Supplementary figure 10.** Gating strategy for analyzing intracellular cytokine (ICS) staining of CD8<sup>+</sup> T cells isolated from MC-38 tumours. Within CD8<sup>+</sup> T cells, defined CD3<sup>+</sup> CD8<sup>+</sup>, expression of the cytokines IFN- $\gamma$ , TNF- $\alpha$ , and IL-2 was analyzed.
