# Supplementary material for: Pyroptosis activates conventional type I dendritic cells to mediate the priming of highly functional anticancer T cells
Source: PubMed Central journal article supplement — J Immunother Cancer. 2024 Apr 4;12(4):e006781. doi: 10.1136/jitc-2023-006781 (PMC11002387; doi:10.1136/jitc-2023-006781), 2024-04-04
Supplement: jitc-2023-006781supp011.pdf [file jitc-2023-006781supp011.pdf]

## S. Figure 11

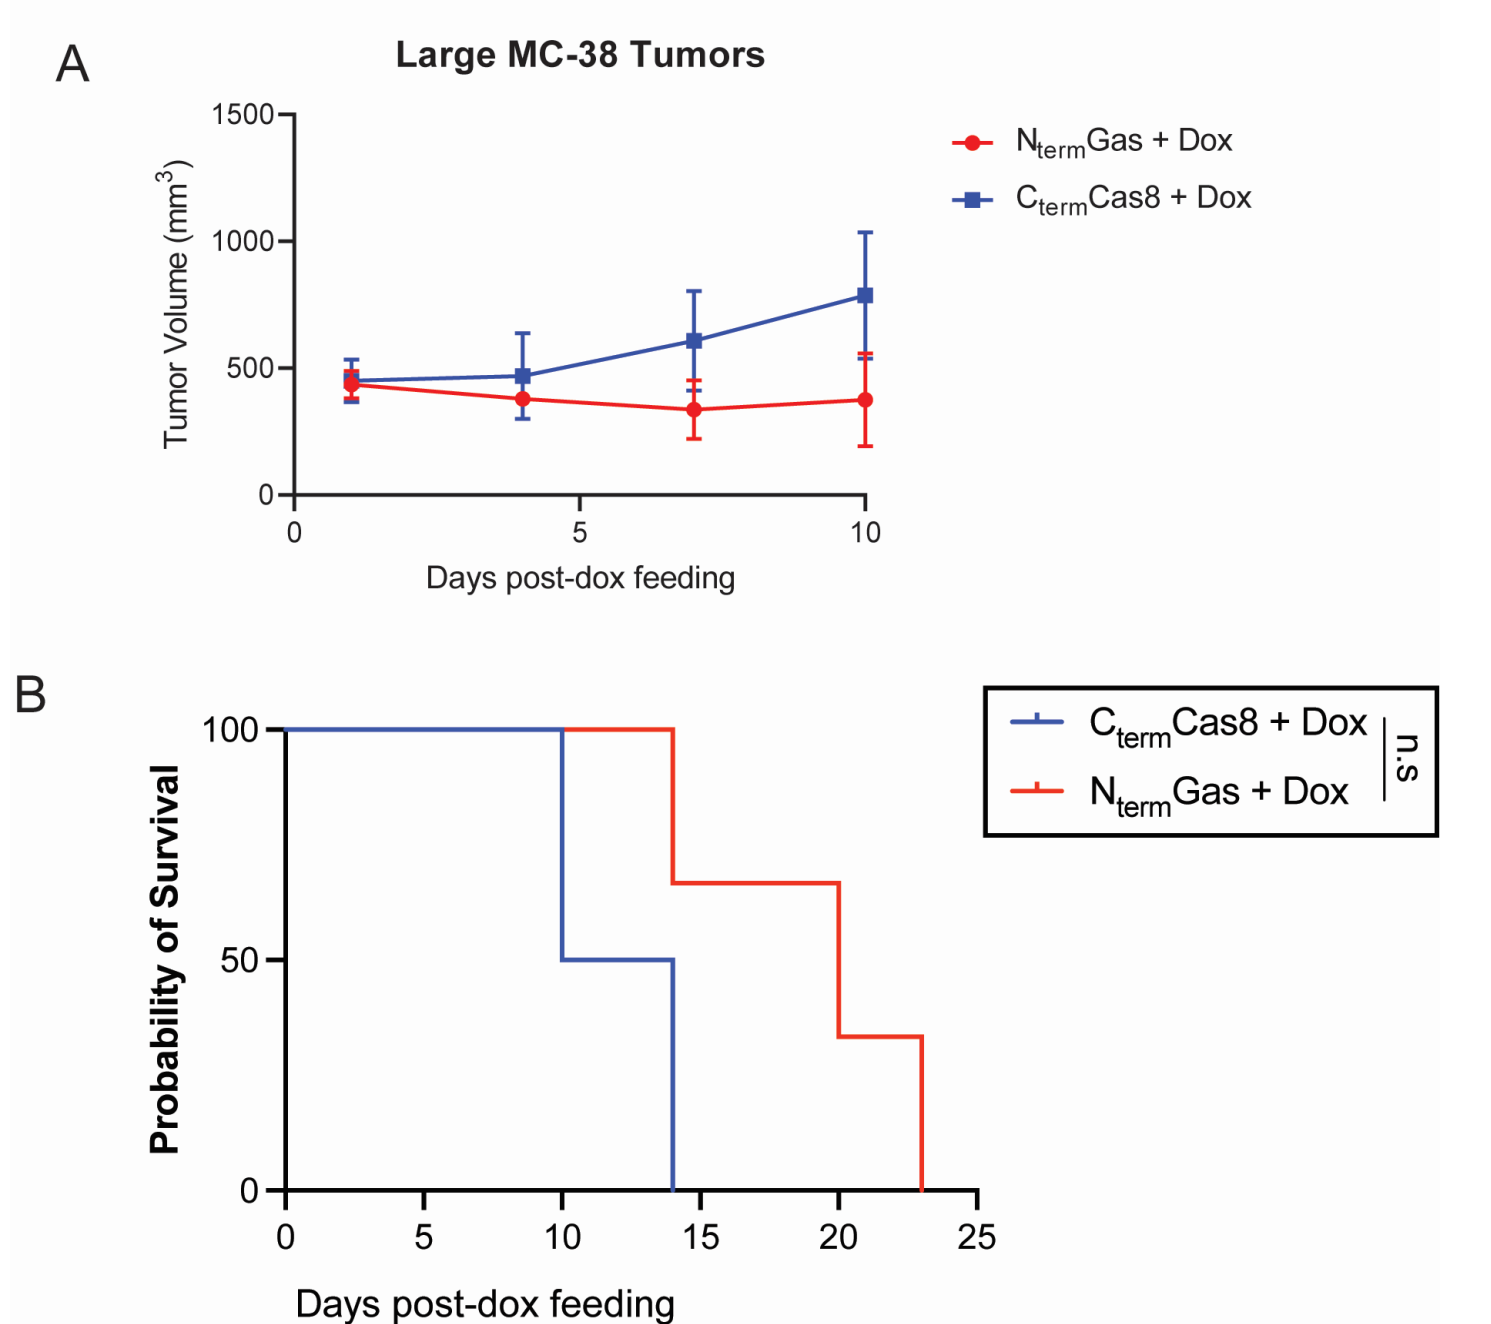

**Supplementary figure 11.** Tumor pyroptosis extends survival of large MC-38 tumours. Tumor growth kinetics (A) and Kaplan Meier survival curves (B) of pyroptosis or apoptosis exposed mice after chimeric tumors reached a large tumor size of  $400 \text{ mm}^3$ . Log-rank (Mantel-Cox) test was used for statistical analysis.  $N = 4$  per group.
