# Supplementary material for: Pyroptosis activates conventional type I dendritic cells to mediate the priming of highly functional anticancer T cells
Source: PubMed Central journal article supplement — J Immunother Cancer. 2024 Apr 4;12(4):e006781. doi: 10.1136/jitc-2023-006781 (PMC11002387; doi:10.1136/jitc-2023-006781), 2024-04-04
Supplement: jitc-2023-006781supp012.pdf [file jitc-2023-006781supp012.pdf]

## S.Figure 12

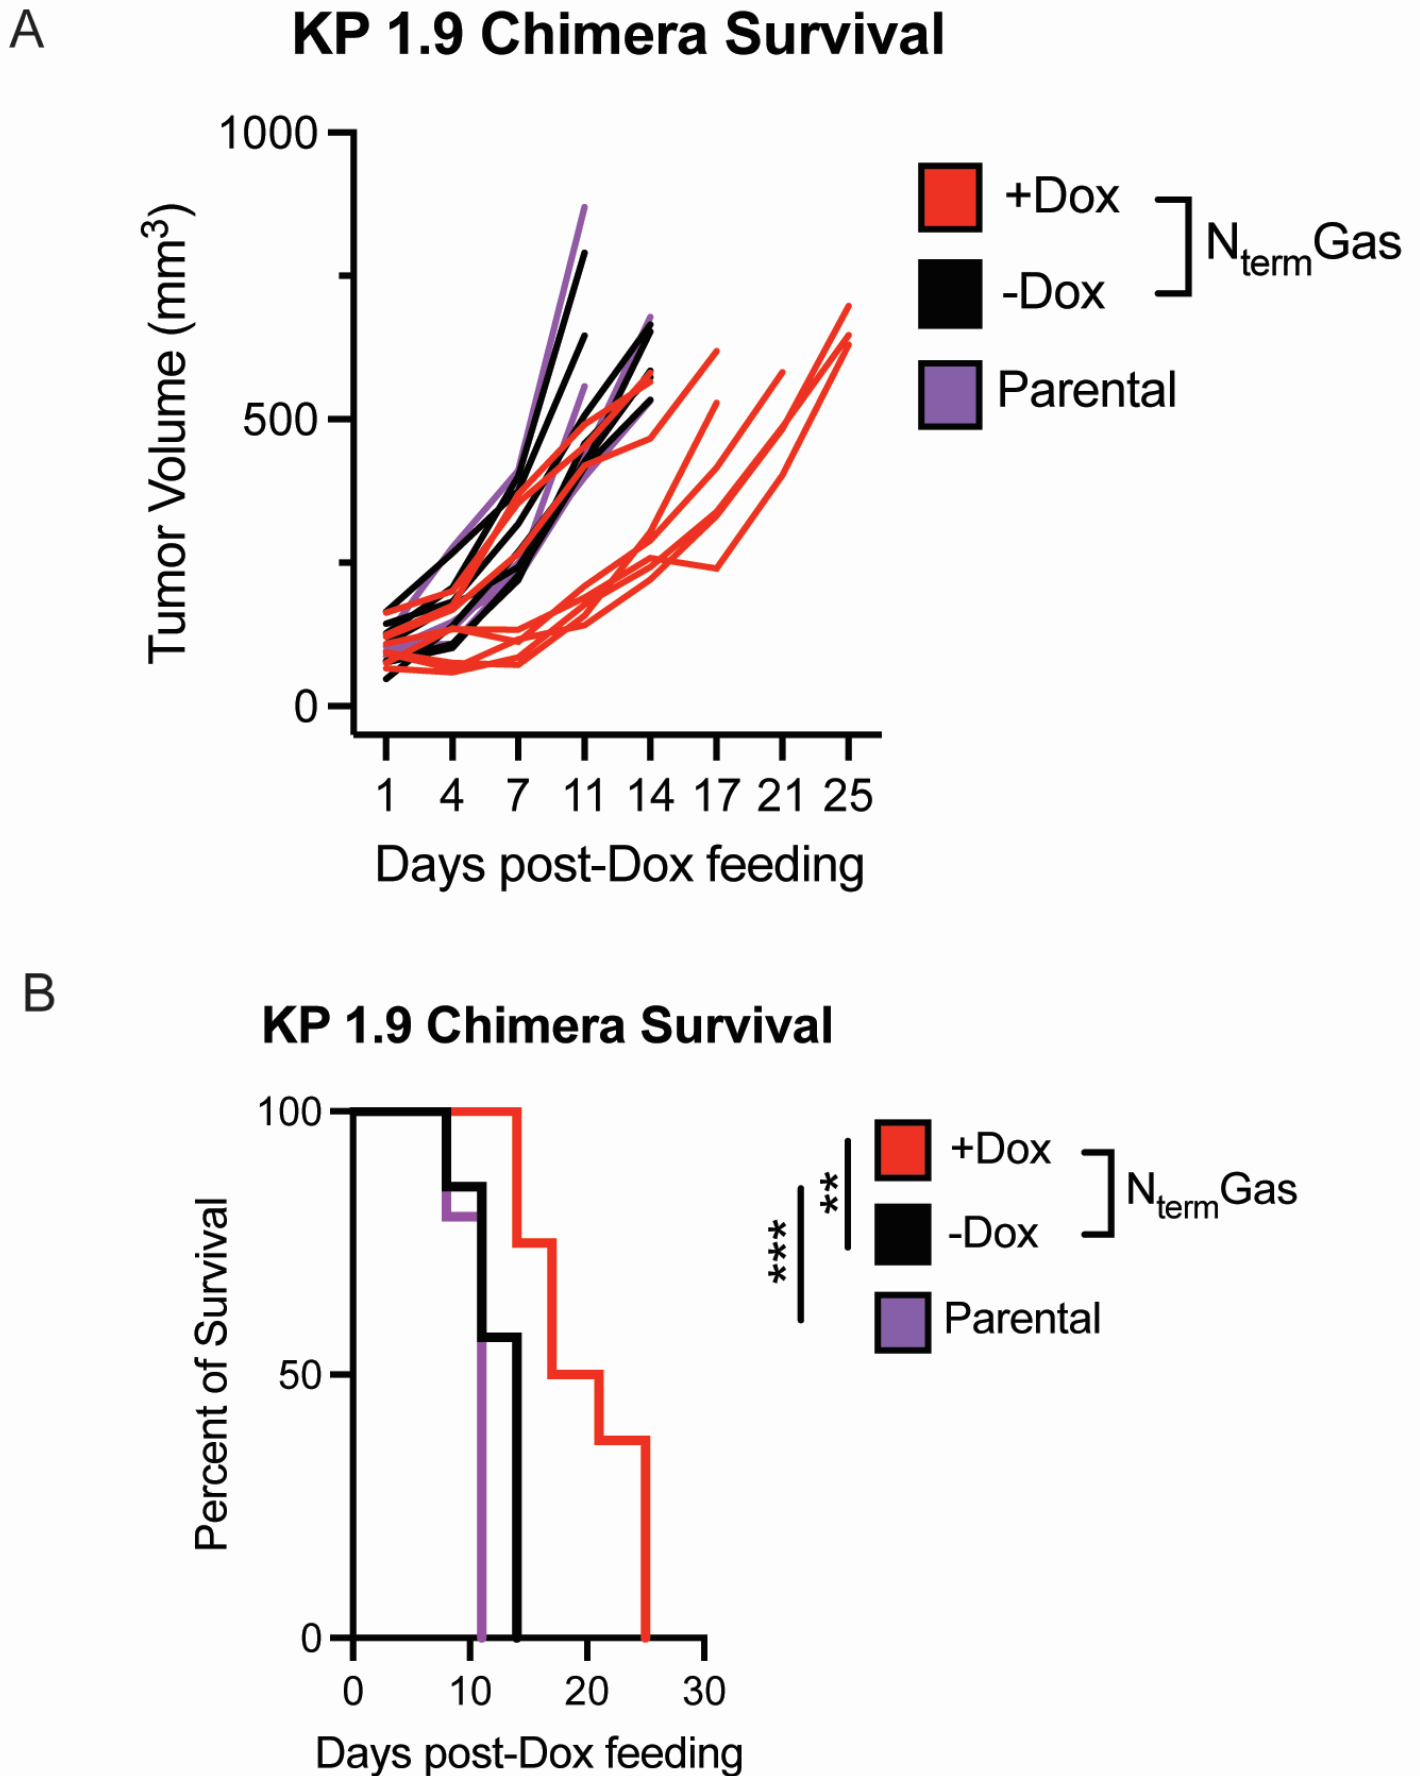

**Supplementary figure 12.** Induction of pyroptosis in KP-1.9 tumours extends median survival time in mice. (A) Tumour growth kinetics of parental KP-1.9 tumors or chimeric tumors (KP-1.9 + KP-1.9-N<sub>term</sub>Gas) with or without doxycycline medicated feeding. (B) Comparison of Kaplan Meier survival in untreated and pyroptosis exposed KP tumours. Log-rank (Mantel-Cox) test was used for statistical analysis. N = 5 per group.
