# Supplementary material for: Pyroptosis activates conventional type I dendritic cells to mediate the priming of highly functional anticancer T cells
Source: PubMed Central journal article supplement — J Immunother Cancer. 2024 Apr 4;12(4):e006781. doi: 10.1136/jitc-2023-006781 (PMC11002387; doi:10.1136/jitc-2023-006781), 2024-04-04
Supplement: jitc-2023-006781supp013.pdf [file jitc-2023-006781supp013.pdf]

## S. Figure 13

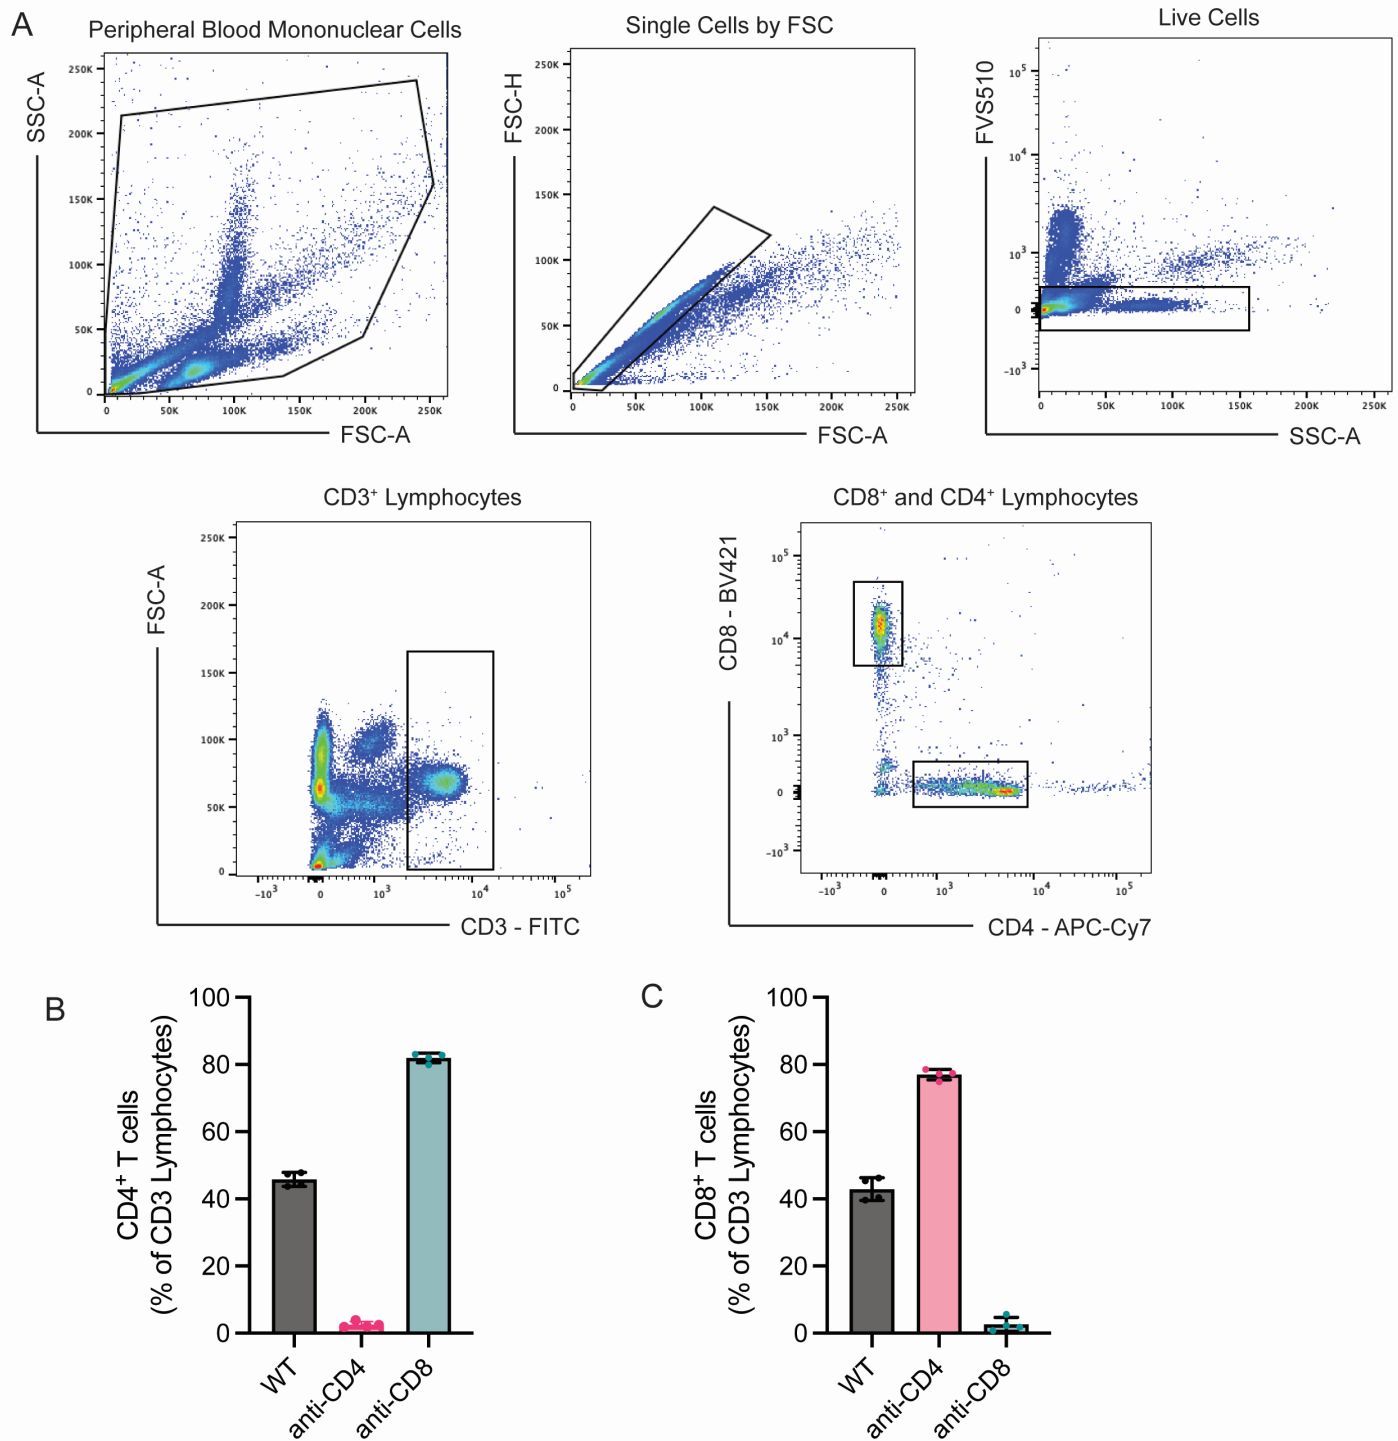

**Supplementary figure 13.** Confirmation of CD4<sup>+</sup> and CD8<sup>+</sup> T cell depletion after monoclonal antibody administration. Gating strategy (A) and quantified CD4<sup>+</sup> (B) and CD8<sup>+</sup> (C) abundance in the blood of treated and control mice.
