# Supplementary material for: Pyroptosis activates conventional type I dendritic cells to mediate the priming of highly functional anticancer T cells
Source: PubMed Central journal article supplement — J Immunother Cancer. 2024 Apr 4;12(4):e006781. doi: 10.1136/jitc-2023-006781 (PMC11002387; doi:10.1136/jitc-2023-006781), 2024-04-04
Supplement: jitc-2023-006781supp014.pdf [file jitc-2023-006781supp014.pdf]

## S. Figure 14

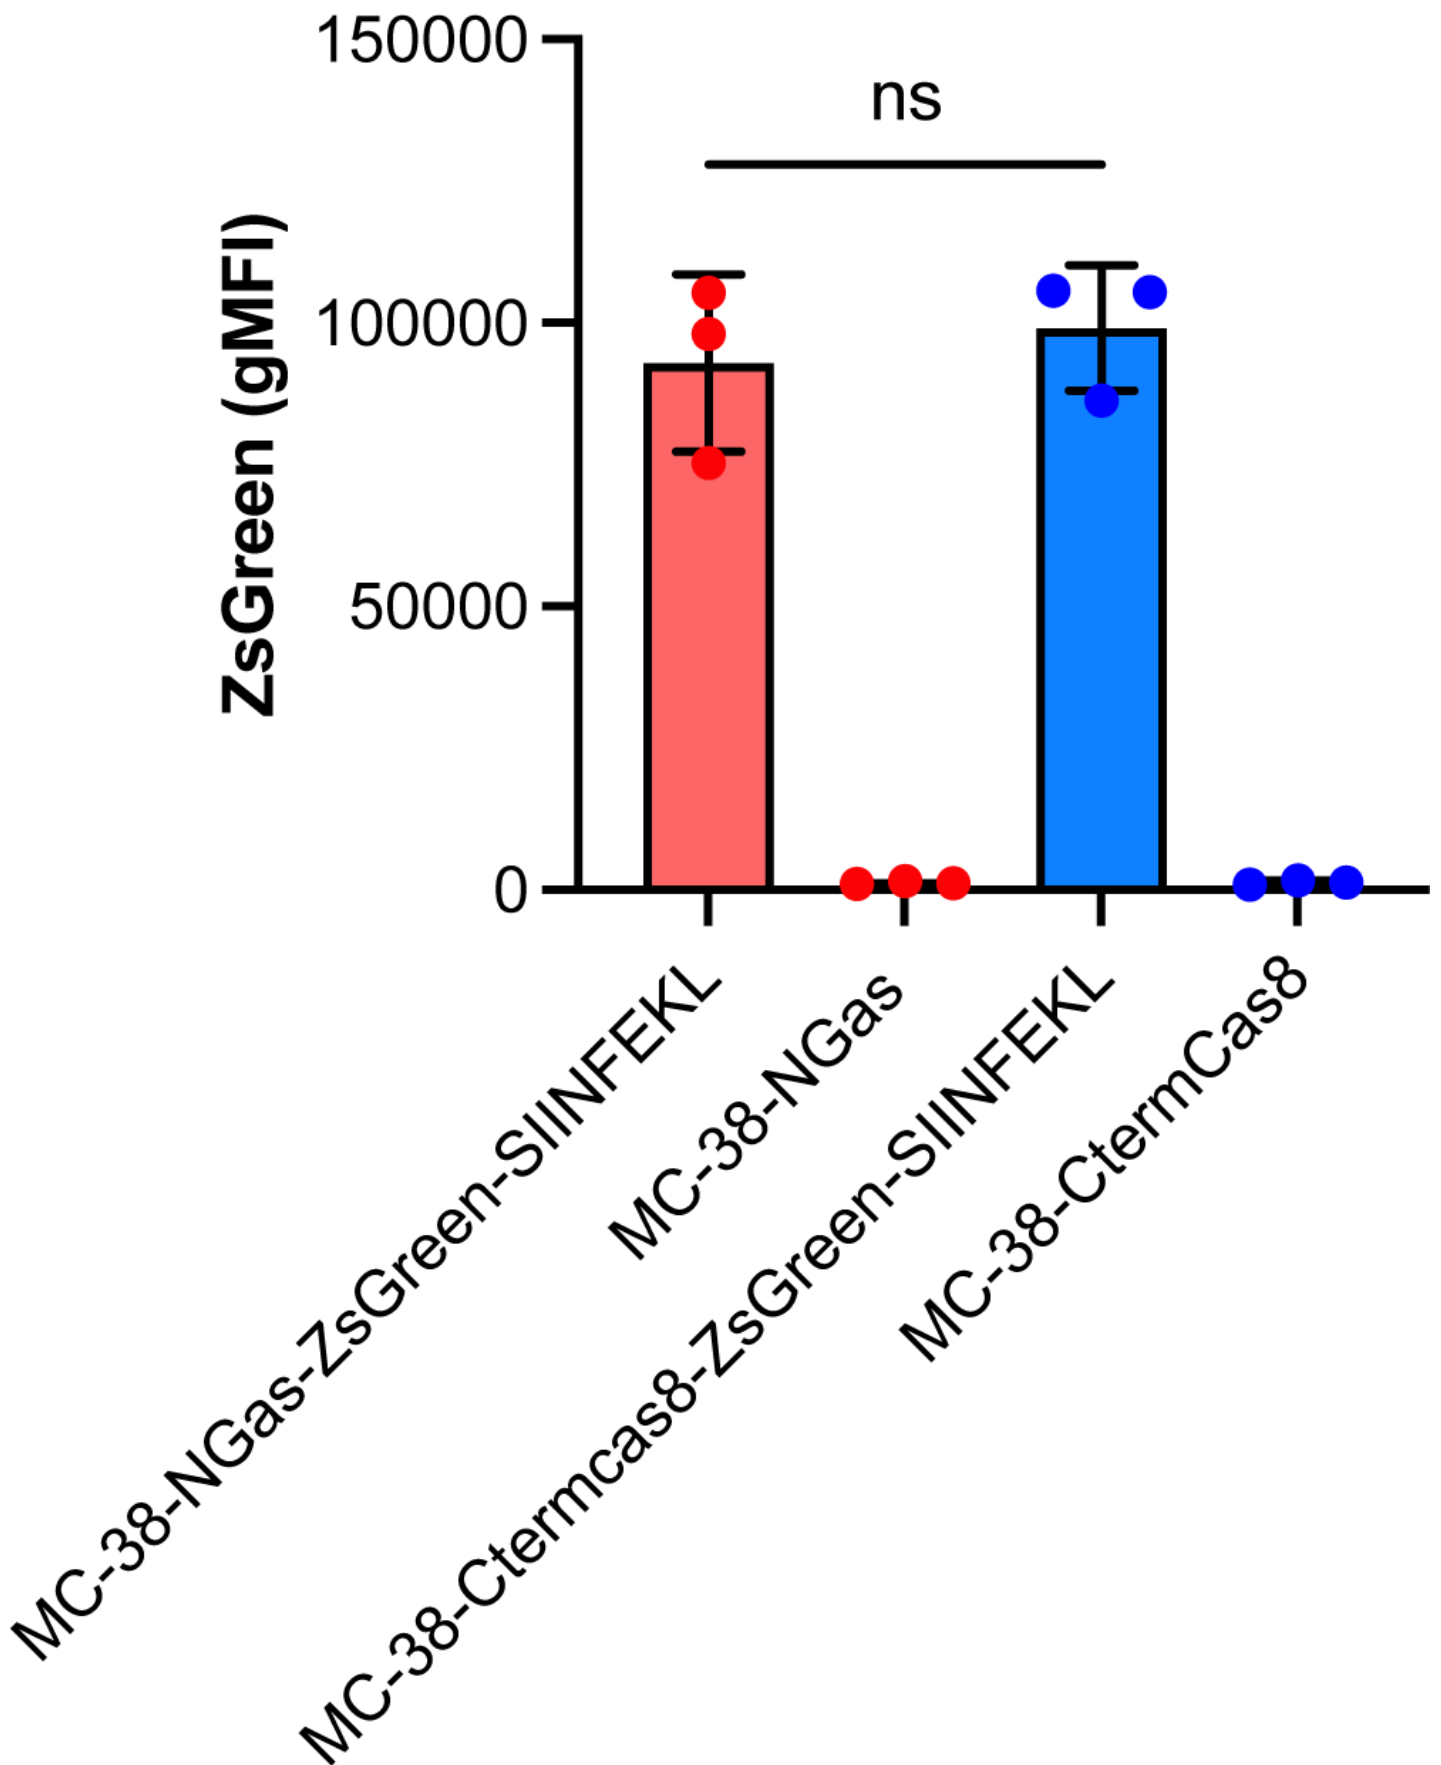

**Supplementary figure 14.** Confirmation of equivalent ZsGreen geometric mean fluorescent intensities between MC-38-dd-C<sub>term</sub>Cas8 and MC-38-N<sub>term</sub>Gas cell lines.
