# Supplementary figures and images for: Pyroptosis activates conventional type I dendritic cells to mediate the priming of highly functional anticancer T cells
Source: PubMed Central journal article supplement — J Immunother Cancer. 2024 Apr 4;12(4):e006781. doi: 10.1136/jitc-2023-006781 (PMC11002387; doi:10.1136/jitc-2023-006781), 2024-04-04

S. Figure 8

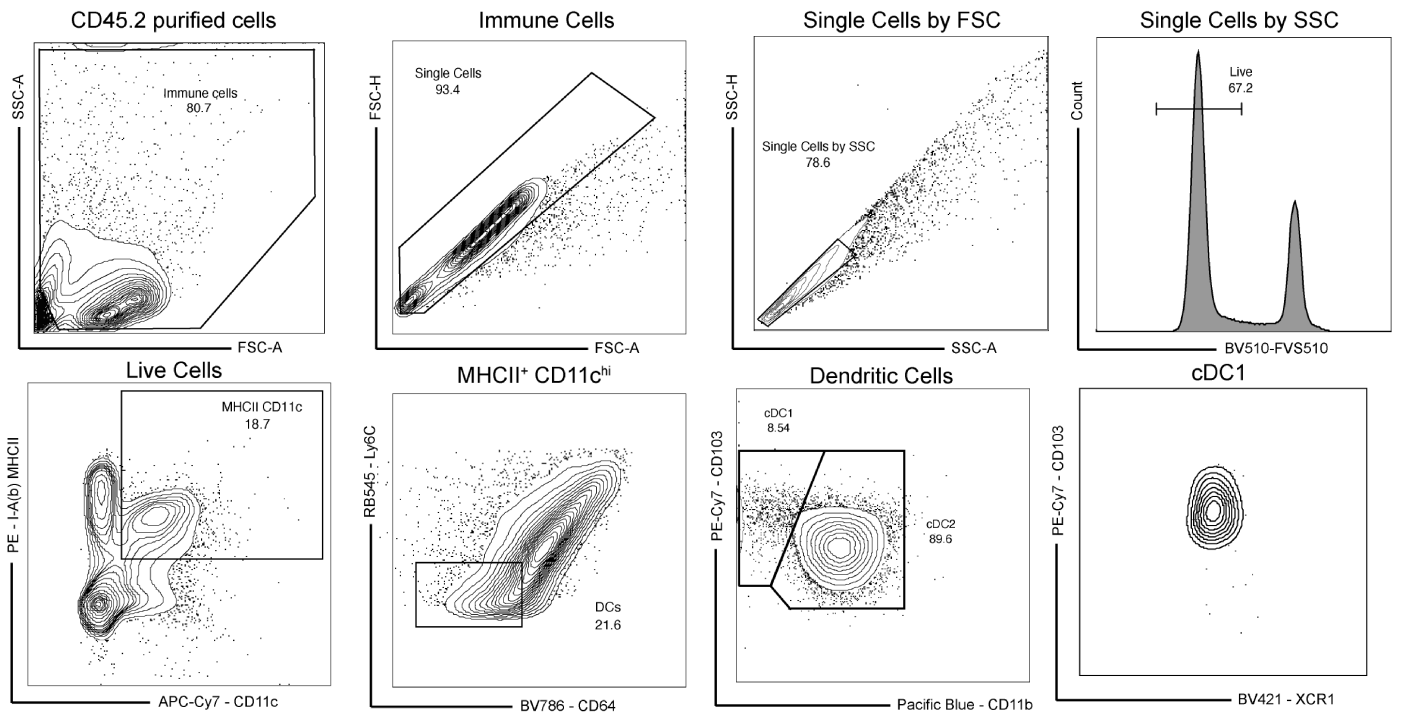

Supplement: jitc-2023-006781supp008.pdf [file jitc-2023-006781supp008.pdf]
